# Supplementary material for: The effect of indoor daylight spectrum and intensity on viability of indoor pathogens on different surface materials
Source: bioRxiv or medRxiv preprint supplement (doi:10.1101/2022.01.14.476401), 2022-01-15

**A**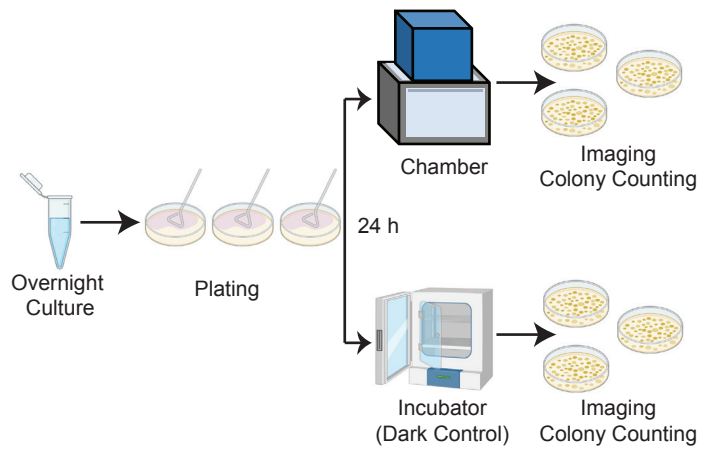**B**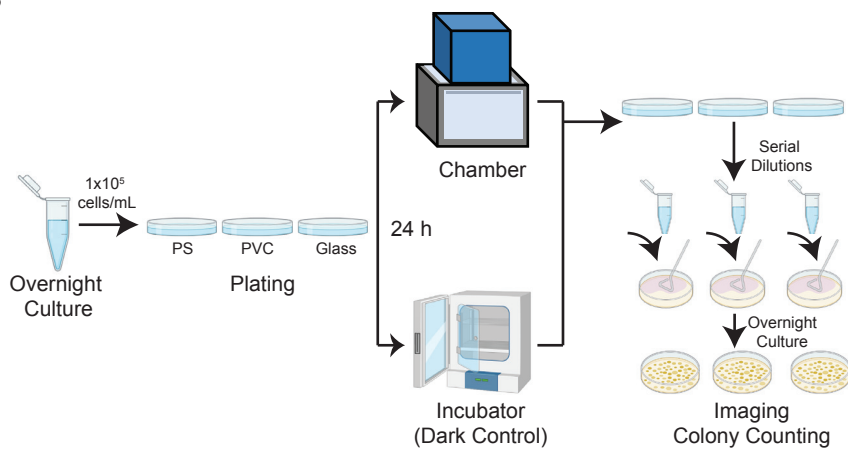

A

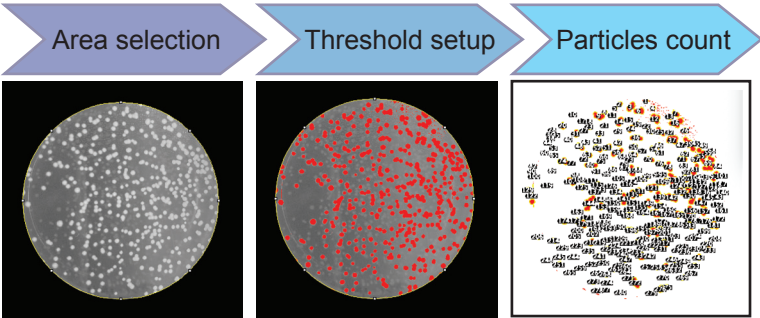

B

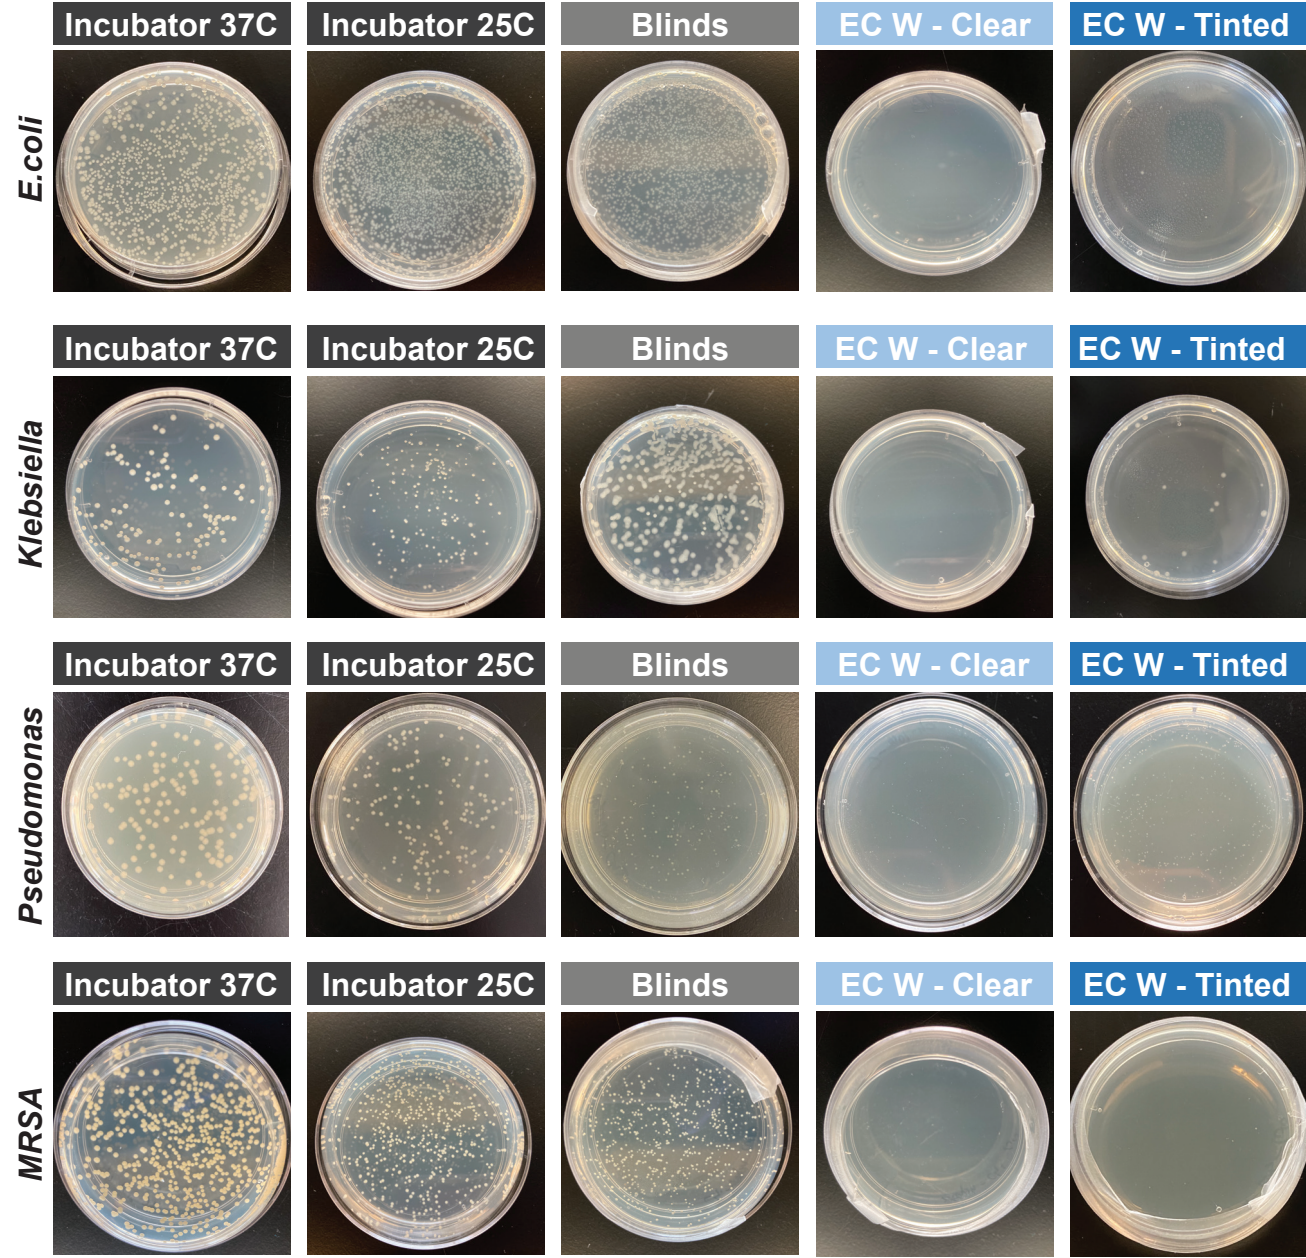

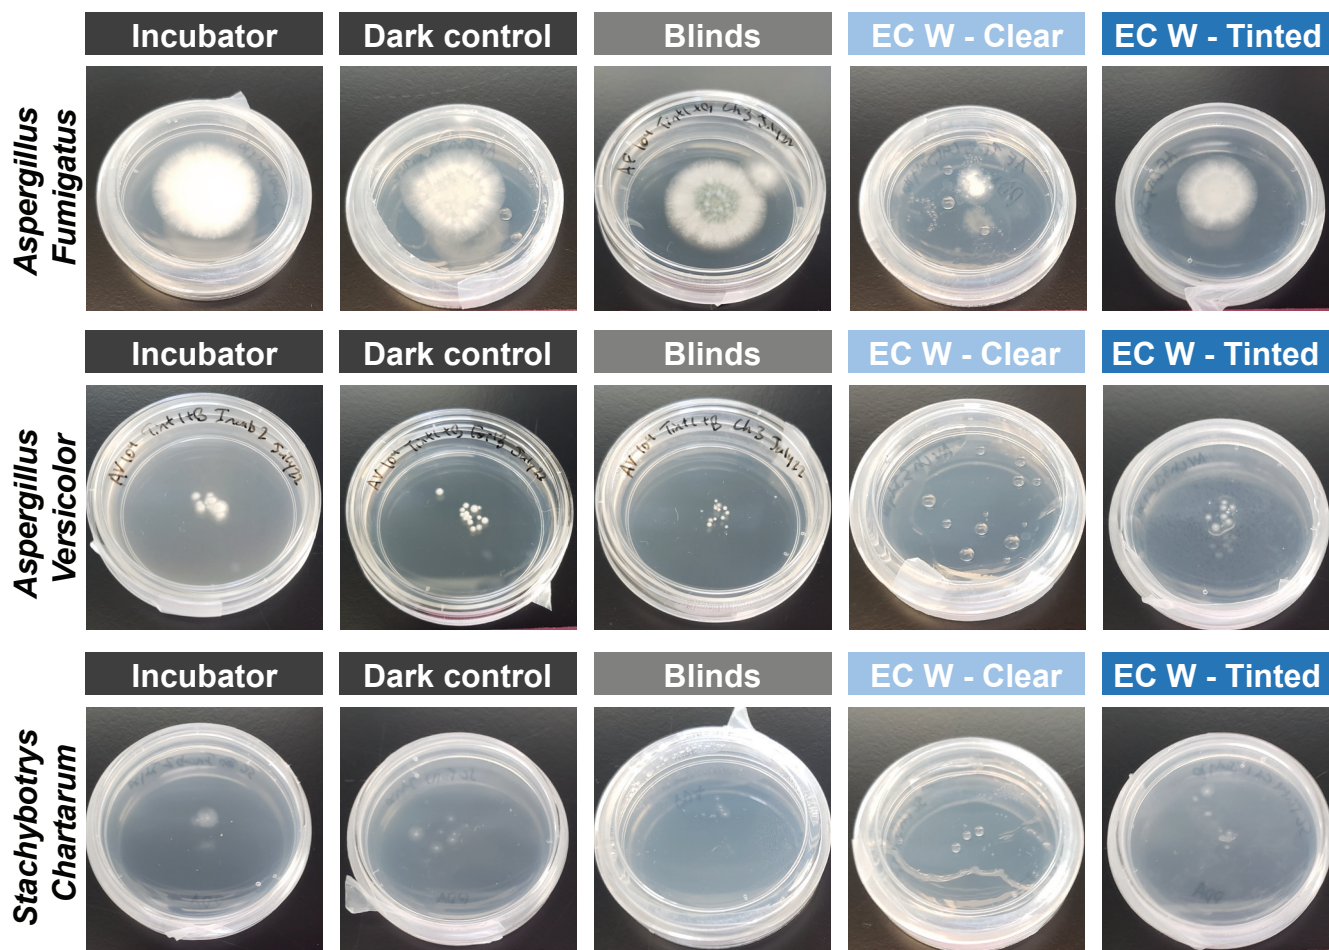

Supplement: Supplementary file [file media-1.pdf]
